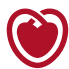

# The Cardiomyopathy Registry of the EURObservational Research Programme of the European Society of Cardiology: baseline data and contemporary management of adult patients with cardiomyopathies

Philippe Charron<sup>1,2,\*†</sup>, Perry M. Elliott<sup>3†</sup>, Juan R. Gimeno<sup>4,5†</sup>, Alida L.P. Caforio<sup>6†</sup>, Juan Pablo Kaski<sup>7†</sup>, Luigi Tavazzi<sup>8</sup>, Michal Tendera<sup>9</sup>, Carole Maupain<sup>1</sup>, Cécile Laroche<sup>10</sup>, Pawel Rubis<sup>11</sup>, Ruxandra Jurcut<sup>12†</sup>, Leonardo Calò<sup>13</sup>, Tiina M. Heliö<sup>14†</sup>, Gianfranco Sinagra<sup>15</sup>, Marija Zdravkovic<sup>16</sup>, Aušra Kavoliūnienė<sup>17</sup>, Stephan B. Felix<sup>18,19</sup>, Jacek Grzybowski<sup>20</sup>, Maria-Angela Losi<sup>21</sup>, Folkert W. Asselbergs<sup>22,23</sup>, José Manuel García-Pinilla<sup>5,24</sup>, Joel Salazar-Mendiguchia<sup>25</sup>, Katarzyna Mizia-Steć<sup>26</sup>, and Aldo P. Maggioni<sup>10,27</sup>, on behalf of the EORP Cardiomyopathy Registry Investigators<sup>‡</sup>

**Other collaborators/contributors: Aris Anastasakis, Elena Biagini, Zofia Bilinska, Francisco Jose Castro, Jelena Celutkiene, Natalija Chakova, Przemyslaw Chmielewski, Fabrizio Drago, Attila Frigy, Andrea Frustaci, Pablo Garcia-Pavia, Sasa Hinic, Ingrid Kindermann, Giuseppe Limongelli, Constancio Medrano, Lorenzo Monserrat, Akinsanya Olusegun-Joseph, Tomas Ripoll-Vera, Luis Rocha Lopes, Aly Saad, Simone Sala, Petar M. Seferovic, Robert Sepp, Jose Angel Urbano-Moral, Eduardo Villacorta, Maciej Wybraniec, Raquel Yotti, Elisabetta Zachara, and Esther Zorio**

<sup>1</sup>Centre de Référence des Maladies Cardiaques Héritaires, Assistance Publique-Hôpitaux de Paris, ICAN, Hôpital Pitié-Salpêtrière, 47 Bvd de l'hôpital, 75013 Paris, France; <sup>2</sup>Université Versailles Saint Quentin & AP-HP, CESP, INSERM U1018, Hôpital Ambroise Paré, 9, Avenue Charles de Gaulle, 92100 Boulogne-Billancourt, France; <sup>3</sup>University College London and Inherited Cardiac Diseases Unit, Barts Heart Centre, St Bartholomew's Hospital, West Smithfield, EC1A 7BE London, UK; <sup>4</sup>Cardiac Department, Hospital Universitario Virgen de la Arrixaca, Ctra. Murcia-Cartagena s/n, 30120 El Palmar Murcia, Spain; <sup>5</sup>CIBER in Cardiovascular Diseases, Instituto Carlos III, Av. de Monforte de Lemos 5, 28029 Madrid, Spain; <sup>6</sup>Division of Cardiology, Department of Cardiological Thoracic and Vascular Sciences, University of Padova, via N Giustiniani 2, 35100 Padova, Italy; <sup>7</sup>Centre for Inherited Cardiovascular Diseases, Great Ormond Street Hospital, Great Ormond Street, WC1N 3JH London, UK; <sup>8</sup>GVM Care and Research, E.S. Health Science Foundation, Maria Cecilia Hospital, Via Corriera, 1, 48010 Cotignola, Italy; <sup>9</sup>Department of Cardiology and Structural Heart Diseases, School of Medicine in Katowice, Medical University of Silesia, Ziolkowa Street 45/47, 40-635 Katowice, Poland; <sup>10</sup>EURObservational Research Programme, European Society of Cardiology, 2035 Route des colles, CS 80179 Biot, 06903 Sophia-Antipolis Cedex, France; <sup>11</sup>Department of Cardiac and Vascular Diseases, John Paul II Hospital, Institute of Cardiology, Jagiellonian University Medical College, Pradnicka street 80, 31-202 Krakow, Poland; <sup>12</sup>Institute of Emergency for Cardiovascular Diseases "Prof.dr.C.C.Iliescu", UMF "Carol Davila", Sos. Fundeni 258, 22328 Bucharest, Romania; <sup>13</sup>Policlinico Casilino, U.O. Cardiologia, Via Casilina, 1049, 00169 Roma, Italy; <sup>14</sup>Heart and Lung Center, Helsinki University Hospital and University of Helsinki, Haartmaninkatu 4, 00290 Helsinki, Finland; <sup>15</sup>Cardiovascular Department, Center for Cardiomyopathies, Azienda Sanitaria Universitaria Integrata, University of Trieste, Via P. Valdoni 7, 34100 Trieste, Italy; <sup>16</sup>University Hospital Medical Center Bezanijaska kosa, Faculty of Medicine, University of Belgrade, Dragise Brasovana 13/8, 11077 Belgrade, Serbia; <sup>17</sup>Lithuanian University of Health Sciences, Eiveniu Str. 2, 50009 Kaunas, Lithuania; <sup>18</sup>Department for Internal Medicine B, University Medicine Greifswald, Ferdinand-Sauerbruch Strasse, 17475 Greifswald, Germany; <sup>19</sup>DZHK (German Centre for Cardiovascular Research), partner site Greifswald, Greifswald, Germany; <sup>20</sup>Department of Cardiomyopathies, Institute of Cardiology, Alpejska 42, 04-628 Warsaw, Poland; <sup>21</sup>Department of Advanced Biomedical Sciences, University Federico II of Naples, Via S. Pansini 5, 80131 Naples, Italy; <sup>22</sup>Department of Cardiology, Division Heart & Lungs, UMC Utrecht, 3508 GA Utrecht, The Netherlands; <sup>23</sup>Institute of Cardiovascular Science, Faculty of Population Health Sciences, University College London, Gower Street, WC1E 6BT London, UK; <sup>24</sup>Heart failure and familial cardiomyopathies division, Cardiology department,

\* Corresponding author. Tel: +33 1 42 16 38 84, Fax: +33 1 42 16 13 64, Email: [philippe.charron@aphp.fr](mailto:philippe.charron@aphp.fr)

† Member of the European Reference Network for Rare, Low-Prevalence or Complex Heart diseases (ERN GUARD-HEART).

‡ The complete list of Investigators is in the [Supplementary material online, Appendix 1](#).

Published on behalf of the European Society of Cardiology. All rights reserved. © The Author(s) 2018. For permissions, please email: [journals.permissions@oup.com](mailto:journals.permissions@oup.com).

Hospital Universitario Virgen de la Victoria, IBIMA, Campus Universitario Teatinos, 29010 Málaga, Spain; <sup>25</sup>Cardiomyopathy, Heart Failure and Transplant Program, Hospital Universitari de Bellvitge, Heart Diseases Institute, Av. Feixa Llarga s/n, 08907 L'Hospitalet de Llobregat, Barcelona, Spain; <sup>26</sup>First Department of Cardiology, School of Medicine in Katowice, Medical University of Silesia, Ochociej, Ziolowa Street 45/47, 40-635 Katowice, Poland; and <sup>27</sup>ANMCO Research Center, Via La Marmora, 34 50121 Firenze, Italy

Received 28 August 2017; revised 22 November 2017; editorial decision 29 December 2017; accepted 9 January 2018; online publish-ahead-of-print 24 January 2018

## Aims

The Cardiomyopathy Registry of the EURObservational Research Programme is a prospective, observational, and multinational registry of consecutive patients with four cardiomyopathy subtypes: hypertrophic cardiomyopathy (HCM), dilated cardiomyopathy (DCM), arrhythmogenic right ventricular cardiomyopathy (ARVC), and restrictive cardiomyopathy (RCM). We report the baseline characteristics and management of adults enrolled in the registry.

## Methods and results

A total of 3208 patients were enrolled by 69 centres in 18 countries [HCM ( $n = 1739$ ); DCM ( $n = 1260$ ); ARVC ( $n = 143$ ); and RCM ( $n = 66$ )]. Differences between cardiomyopathy subtypes ( $P < 0.001$ ) were observed for age at diagnosis, history of familial disease, history of sustained ventricular arrhythmia, use of magnetic resonance imaging or genetic testing, and implantation of defibrillators. When compared with probands, relatives had a lower age at diagnosis ( $P < 0.001$ ), but a similar rate of symptoms and defibrillators. When compared with the Long-Term phase, patients of the Pilot phase (enrolled in more expert centres) had a more frequent rate of familial disease ( $P < 0.001$ ), were more frequently diagnosed with a rare underlying disease ( $P < 0.001$ ), and more frequently implanted with a defibrillator ( $P = 0.023$ ). Comparing four geographical areas, patients from Southern Europe had a familial disease more frequently ( $P < 0.001$ ), were more frequently diagnosed in the context of a family screening ( $P < 0.001$ ), and more frequently diagnosed with a rare underlying disease ( $P < 0.001$ ).

## Conclusion

By providing contemporary observational data on characteristics and management of patients with cardiomyopathies, the registry provides a platform for the evaluation of guideline implementation. Potential gaps with existing recommendations are discussed as well as some suggestions for improvement of health care provision in Europe.

## Keywords

Cardiomyopathy • Registry • Hypertrophic • Dilated • Restrictive • Arrhythmogenic right ventricular

## Introduction

Cardiomyopathies are a heterogeneous group of disorders characterized by structural and functional abnormalities of the myocardium that are not explained solely by coronary artery disease or abnormal loading conditions.<sup>1</sup> These disorders represent a significant health burden since they can cause premature death from arrhythmia, progressive heart failure, or stroke.<sup>2–9</sup> To date, most information about the presentation and natural history of cardiomyopathies has derived from cohort studies in a small number of specialized centres, and there is very little data describing the contemporary profile and the practical management of the patients outside highly expert units.

The EURObservational Research Programme (EORP) Cardiomyopathy registry was conceived by the European Society of Cardiology (ESC) Working Group on Myocardial and Pericardial Disease, to collect clinical data on patients with a confirmed diagnosis of a cardiomyopathy (Figure 1). The general aim of the registry is to provide a summary of contemporary features and management of patients with cardiomyopathy or myocarditis, across a large range of centres in the Europe in order to improve clinical service provision and therapy.

In this article, we present the data on the adult population with a cardiomyopathy, combining Pilot and Long-Term phases. Enrollment of patients with a myocarditis or paediatric patients with a cardiomyopathy, is still ongoing.

## Methods

### General design

This is a prospective observational multinational multicentre registry of consecutive patients presenting to cardiology centres in the European countries. Participating centres were selected using pre-specified criteria (see [Supplementary material online, File S1](#)). Each centre was asked to enter about 40 consecutively-assessed patients (up to 40 in Pilot phase, minimum 40 in Long-Term phase) over a 12-month period. The study was approved by each local Ethical Committee according to the local rules. Written informed consent was obtained from all participants before data collection. All diagnostic or management procedures were left to the discretion of the attending physician, including the clinical investigations made at the time of enrollment, and diagnostic criteria were not centrally verified. Baseline data were collected (including demographic, clinical, cardiac, genetic, and therapeutic parameters) using a web-based electronic case report form. The EORP department of the ESC was responsible for study management, data quality control, and statistical analyses.

The registry was conducted by an Executive Committee and managed by the EORP department of the ESC. A Pilot phase of the registry, restricted to adult patients with a cardiomyopathy, was conducted for validating the structure and quality of the data set.<sup>10</sup> A Long-Term phase was subsequently agreed and extended in three directions: (i) further enrollment of adult patients with a cardiomyopathy, (ii) extended enrollment of paediatric patients with a cardiomyopathy, in collaboration with the Association for European Paediatric and Congenital Cardiology Working Group on Genetics, Basic Science and Inherited Muscle

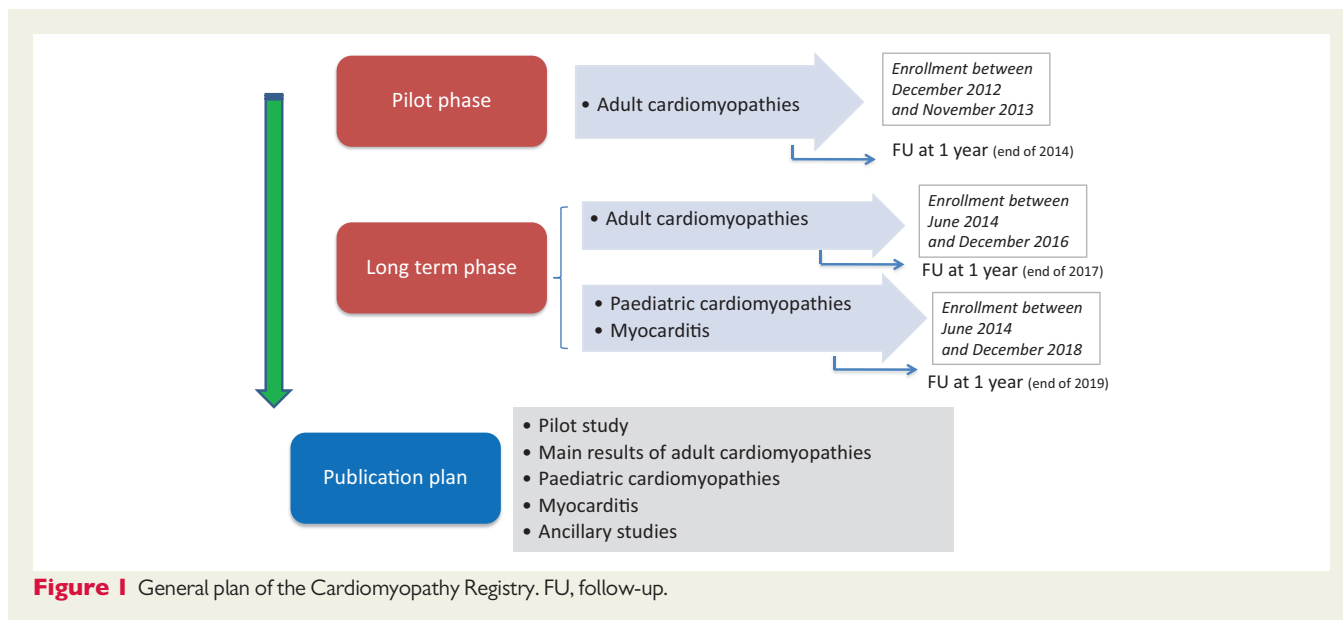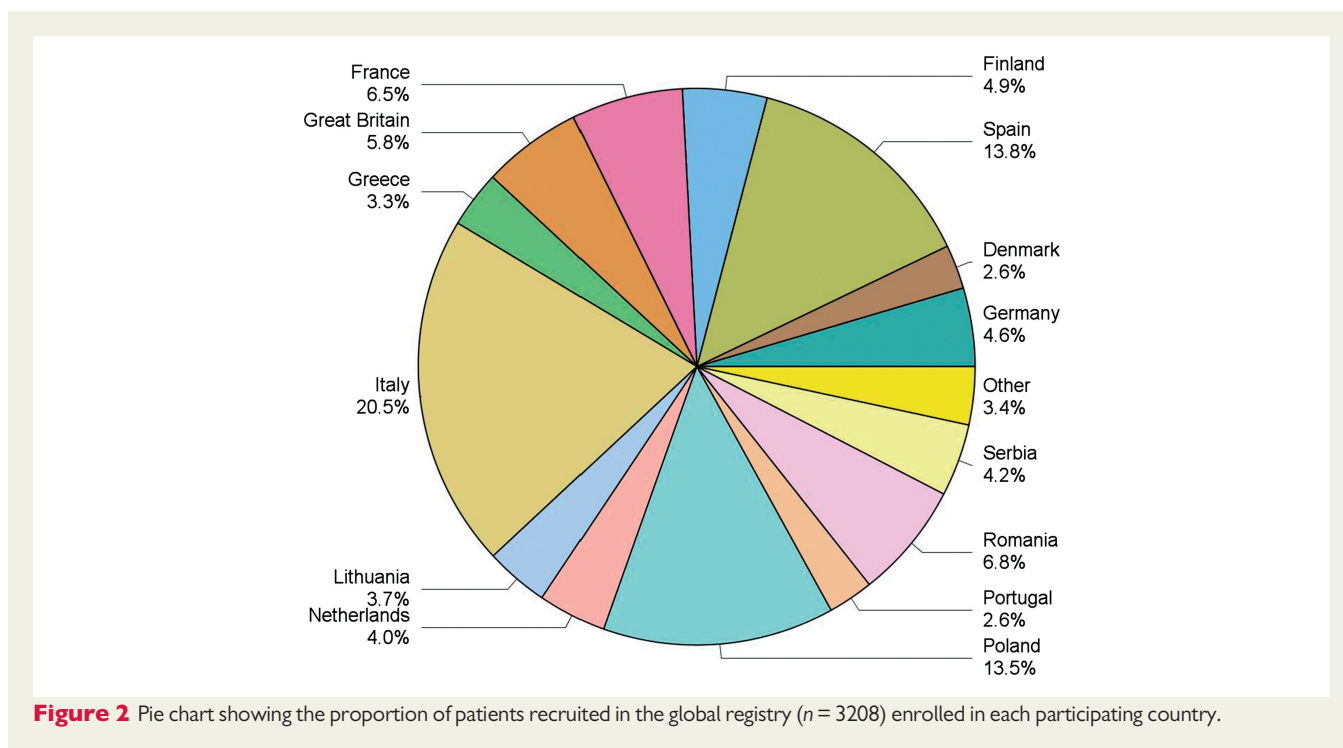

Diseases (AEPC WG), and (iii) extended enrollment of patients with clinically suspected or biopsy-proven myocarditis.

### Patients and cardiomyopathies subtypes

Patients with one of four major cardiomyopathy subtypes were eligible for the study: hypertrophic cardiomyopathy (HCM), dilated cardiomyopathy (DCM), arrhythmogenic right ventricular cardiomyopathy (ARVC), and restrictive cardiomyopathy (RCM). Familial/genetic forms and non-familial/non-genetic forms were included. Patients met the following inclusion criteria for the adult cardiomyopathies registry: (i) age at

enrollment >18 years, (ii) willing and able to give informed consent, (iii) able to comply with all study requirements, and (iv) documented cardiomyopathy fulfilling standard diagnostic criteria for probands or for relatives (see [Supplementary material online, File S2](#)). Relevant definitions used for analyses of subgroups (including definition of regions) are included in the [Supplementary material online, File S3](#).

### Statistical analyses

Univariable analysis was applied to both continuous and categorical variables. Continuous variables were reported as mean ± standard deviation

**Table 1** Baseline characteristics in relation to cardiomyopathy subtypes

|                                                                     | HCM (n = 1739)   | DCM (n = 1260)   | RCM (n = 66)     | ARVC (n = 143)   | P-value            |
|---------------------------------------------------------------------|------------------|------------------|------------------|------------------|--------------------|
| Age at enrollment (years), n                                        | 1739             | 1260             | 66               | 143              |                    |
| Median (Q1–Q3)                                                      | 55.0 (42.0–65.0) | 55.0 (45.0–63.0) | 60.0 (44.0–69.0) | 48.0 (34.0–56.0) | <0.001             |
| Age at diagnosis (years), n                                         | 1046             | 900              | 37               | 82               |                    |
| Median (Q1–Q3)                                                      | 47.0 (33.0–59.0) | 49.0 (40.0–58.0) | 57.0 (37.0–68.0) | 39.0 (30.0–51.0) | <0.001             |
| Males, n (%)                                                        | 1028/1739 (59.1) | 935/1260 (74.2)  | 32/66 (48.5)     | 94/143 (65.7)    | <0.001             |
| Family history of SCD, n (%)                                        | 350/1662 (21.1)  | 132/1111 (11.9)  | 8/60 (13.3)      | 34/136 (25.0)    | <0.001             |
| Familial disease, n (%)                                             | 661/1362 (48.5)  | 238/945 (25.2)   | 15/50 (30.0)     | 43/106 (40.6)    | <0.001             |
| Reason for diagnosis, n (%)                                         |                  |                  |                  |                  |                    |
| Incidental                                                          | 364/1616 (22.5)  | 116/1198 (9.7)   | 5/66 (7.6)       | 14/140 (10.0)    | <0.001             |
| Symptoms                                                            | 904/1616 (55.9)  | 970/1198 (81.0)  | 58/66 (87.9)     | 90/140 (64.3)    |                    |
| Sudden death/cardiac arrest                                         | 18/1616 (1.1)    | 20/1198 (1.7)    | 0/66 (0.0)       | 9/140 (6.4)      |                    |
| Family screening                                                    | 268/1616 (16.6)  | 57/1198 (4.8)    | 1/66 (1.5)       | 22/140 (15.7)    |                    |
| Other                                                               | 62/1616 (3.8)    | 35/1198 (2.9)    | 2/66 (3.0)       | 5/140 (3.6)      |                    |
| Presence of symptoms, n (%)                                         | 1470/1734 (84.8) | 1128/1257 (89.7) | 64/66 (97.0)     | 120/143 (83.9)   | <0.001             |
| Suspected arrhythmic/cardiogenic syncope, n (%)                     | 179/1453 (12.3)  | 90/1103 (8.2)    | 6/64 (9.4)       | 41/116 (35.3)    | <0.001             |
| Anginal chest pain, n (%)                                           | 513/1475 (34.8)  | 235/1131 (20.8)  | 8/64 (12.5)      | 17/120 (14.2)    | <0.001             |
| NYHA class, n (%)                                                   |                  |                  |                  |                  |                    |
| Class I                                                             | 463/1417 (32.7)  | 198/1049 (18.9)  | 11/63 (17.5)     | 61/103 (59.2)    | <0.001             |
| Class II                                                            | 707/1417 (49.9)  | 448/1049 (42.7)  | 26/63 (41.3)     | 38/103 (36.9)    |                    |
| Class III                                                           | 228/1417 (16.1)  | 316/1049 (30.1)  | 25/63 (39.7)     | 4/103 (3.9)      |                    |
| Class IV                                                            | 19/1417 (1.3)    | 87/1049 (8.3)    | 1/63 (1.6)       | 0/103 (0.0)      |                    |
| Palpitations, n (%)                                                 | 547/1475 (37.1)  | 407/1131 (36.0)  | 12/64 (18.8)     | 74/120 (61.7)    | <0.001             |
| Arrhythmia and stroke history, n (%)                                |                  |                  |                  |                  |                    |
| History of atrial fibrillation                                      | 463/1739 (26.6)  | 356/1260 (28.3)  | 32/66 (48.5)     | 20/143 (14.0)    | <0.001             |
| History of sustained ventricular tachycardia                        | 134/1739 (7.7)   | 171/1260 (13.6)  | 1/66 (1.5)       | 56/143 (39.2)    | <0.001             |
| History of resuscitated ventricular fibrillation/<br>cardiac arrest | 49/1739 (2.8)    | 61/1260 (4.8)    | 3/66 (4.5)       | 18/143 (12.6)    | <0.001             |
| History of stroke                                                   | 59/1728 (3.4)    | 57/1254 (4.5)    | 3/66 (4.5)       | 3/143 (2.1)      | NC                 |
| History of AV block                                                 | 101/1058 (9.5)   | 83/914 (9.1)     | 7/37 (18.9)      | 6/84 (7.1)       | 0.206              |
| Procedures prior or at the time to enrollment, n (%)                |                  |                  |                  |                  |                    |
| ECG                                                                 | 1684/1739 (96.8) | 1241/1260 (98.5) | 66/66 (100.0)    | 142/143 (99.3)   | 0.008 <sup>a</sup> |
| Echocardiogram                                                      | 1666/1739 (95.8) | 1221/1260 (96.9) | 63/66 (95.5)     | 136/143 (95.1)   | 0.387              |
| LVEDD (mm), mean (SD)                                               | 45.4 (6.9)       | 64.2 (9.8)       | 46.6 (8.6)       | 50.4 (6.3)       | <0.001             |
| LV ejection fraction (Simpson's biplane) (%),<br>mean (SD)          | 62.2 (11.4)      | 32.5 (11.8)      | 53.8 (10.4)      | 55.4 (10.9)      | <0.001             |
| Maximum LV thickness (mm), mean (SD)                                | 19.7 (5.0)       | 10.4 (2.1)       | 15.1 (4.4)       | 9.7 (1.7)        | <0.001             |
| MRI                                                                 | 588/1739 (33.8)  | 259/1260 (20.6)  | 24/66 (36.4)     | 73/143 (51.0)    | <0.001             |
| Holter ECG                                                          | 1163/1739 (66.9) | 469/1260 (37.2)  | 23/66 (34.8)     | 97/143 (67.8)    | <0.001             |
| Exercise test                                                       | 687/1739 (39.5)  | 349/1260 (27.7)  | 5/66 (7.6)       | 69/143 (48.3)    | <0.001             |
| Endomyocardial biopsy                                               | 15/676 (2.2)     | 73/348 (21.0)    | 17/29 (58.6)     | 14/58 (24.1)     | <0.001             |
| Genetic testing performed                                           | 755/1627 (46.4)  | 203/1137 (17.9)  | 27/63 (42.9)     | 71/130 (54.6)    | <0.001             |

AV, atrioventricular; ARVC, arrhythmogenic right ventricular cardiomyopathy; DCM, dilated cardiomyopathy; ECG, electrocardiogram; HCM, hypertrophic cardiomyopathy; LVEDD, left ventricular end diastolic diameter; RCM, restrictive cardiomyopathy; MRI, magnetic resonance imaging; NC, not computed; NYHA, New York Heart Association; SCD, sudden cardiac death; SD, standard deviation; Q, quartile.

<sup>a</sup>The Fisher's exact test.

and/or as median and interquartile range (IQR) when appropriate. Among-group comparisons were made using a non-parametric test (Kruskal–Wallis). Categorical variables were reported as percentages. Among-group comparisons were made using a  $\chi^2$  test or a Fisher's exact test if any expected cell count was <5. A two-sided *P*-value of <0.05 was considered as statistically significant. All analyses were performed using SAS statistical software version 9.4 (SAS Institute, Inc., Cary, NC, USA).

## Results

### Enrollment

Sixty-nine centres from 18 countries participated in the study (Figure 2, Supplementary material online, Table S1, Figure S1). A total of 3208 consecutive adult patients with a cardiomyopathy were enrolled (Table 1),

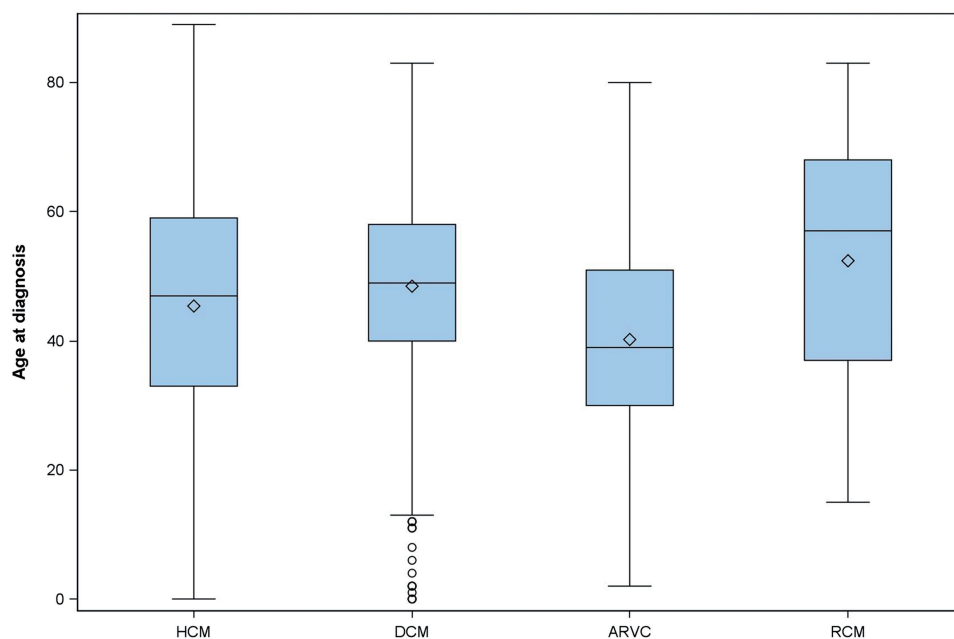

**Figure 3** Box-plot with distribution of age at diagnosis for each cardiomyopathy subtype. ARVC, arrhythmogenic right ventricular cardiomyopathy; DCM, dilated cardiomyopathy; HCM, hypertrophic cardiomyopathy; RCM, restrictive cardiomyopathy. Distribution is presented with mean, lower extreme, 1st quartile (25th percentile), median (50th percentile), 3rd quartile (75th percentile), upper extreme and outliers.

including 42.9% incident patients vs. 57.1% prevalent patients, 83.0% proband vs. 17.0% relatives, 34.8% patients from the Pilot phase vs. 65.2% from the Long-Term phase, and 59.7% outpatients vs. 40.3% inpatients. Median age at enrollment was 55.0 years (IQR 43–64) and there was a male predominance for all cardiomyopathy subtypes except RCM ( $P < 0.001$ ). The mean number of patients enrolled per centre was 46.5 (median 40, IQR 22–50).

## Diagnosis

The commonest diagnosis was HCM ( $n = 1739$ , 54.2%), then DCM ( $n = 1260$ , 39.3%), ARVC ( $n = 143$ , 4.4%), and RCM ( $n = 66$ , 2.1%) (Table 1). In addition, left ventricular non-compaction was reported in 4.1% of total patients. Median age at diagnosis was 49.0 years (IQR 38–59) (Figure 3), differed significantly between cardiomyopathies ( $P < 0.001$ ) and was lower in patients with ARVC (39.0 years IQR 30–51) than in patients with RCM (54.0 years IQR 37–65). A large distribution for age at diagnosis was observed for all subtypes, with a 'lower extreme limit' of box-plot that was 0 years for HCM, 13 years for DCM, 15 years for RCM, and 2 years for ARVC.

## Familial disease and aetiology

A history of familial disease was observed in 38.9% of the total population (Table 1), with significant differences according to cardiomyopathy subtypes ( $P < 0.001$ ). The proportion was higher in HCM and ARVC (48.5% and 40.6%, respectively) and lower in RCM and DCM (30.0% and 25.2%, respectively). Details concerning rare causes of cardiomyopathy subtypes are reported in Supplementary material online, Table S2.

## History of arrhythmia, symptoms, and diagnostic tests

Main symptoms, history of arrhythmia or stroke, and use of cardiac investigations are reported in Table 1. History of sustained ventricular tachycardia was observed most often in patients with ARVC (39.2%) and the least in RCM (1.5%). History of atrial fibrillation was recorded most frequently in patients with RCM (48.5%) and the least in ARVC (14.0%). Electrocardiogram and echocardiogram were performed in nearly all patients ( $\geq 95.1\%$ ). Magnetic resonance imaging (MRI) was performed most frequently in patients with ARVC (51.0%) and least frequently in DCM (20.6%) (global comparison  $P < 0.001$ ). Genetic testing was performed in 35.7% of patients. Endomyocardial biopsy was performed in 119 patients (10.7% of the patients for whom this item was completed).

## Drugs and therapeutic procedures prior to enrollment

Table 2 describes medications and procedures prior to enrollment. Beta-blockers were the most frequently recorded drugs (80.6% of all patients). Implantable cardioverter defibrillator (ICD) was reported in 25.9% of the whole population (primary prophylaxis 81.4%), most frequently in patients with ARVC (56.6% of patients) followed by DCM (31.7%), HCM (19.9%), and RCM (9.1%). A pacemaker was implanted in 10.2% of the whole cohort, most frequently in patients with DCM (14.3%) and least frequently in ARVC (2.8%).

## Subgroups

Subgroup analyses are presented in Table 3.



**Table 2** Therapeutics at baseline in relation to cardiomyopathy subtypes

|                                                      | HCM (n = 1739)   | DCM (n = 1260)   | RCM (n = 66) | ARVC (n = 143) | P-value             |
|------------------------------------------------------|------------------|------------------|--------------|----------------|---------------------|
| Procedures prior to enrollment, n (%)                |                  |                  |              |                |                     |
| Cardioverter defibrillator implanted                 | 346/1739 (19.9)  | 399/1260 (31.7)  | 6/66 (9.1)   | 81/143 (56.6)  | <0.001              |
| Reason for cardioverter defibrillator                |                  |                  |              |                |                     |
| Primary prophylaxis                                  | 297/346 (85.8)   | 331/399 (83.0)   | 3/6 (50.0)   | 46/81 (56.8)   | <0.001 <sup>b</sup> |
| Secondary prophylaxis                                | 49/346 (14.2)    | 68/399 (17.0)    | 3/6 (50.0)   | 35/81 (43.2)   |                     |
| Pacemaker implanted                                  | 135/1723 (7.8)   | 177/1240 (14.3)  | 8/65 (12.3)  | 4/141 (2.8)    | <0.001              |
| Septal myectomy                                      | 85/1739 (4.9)    | —                | —            | —              |                     |
| Alcohol septal ablation                              | 70/1739 (4.0)    | —                | —            | —              |                     |
| Cardiac ablation <sup>a</sup>                        | 62/1739 (3.6)    | 44/1260 (3.5)    | 2/66 (3.0)   | 16/143 (11.2)  | <0.001              |
| Medications, n (%)                                   |                  |                  |              |                |                     |
| Beta-blockers                                        | 1294/1739 (74.4) | 1130/1260 (89.7) | 42/66 (63.6) | 119/143 (83.2) | <0.001              |
| Diuretics, oral                                      | 491/1563 (31.4)  | 895/1247 (71.8)  | 53/62 (85.5) | 24/131 (18.3)  | <0.001              |
| ACE-inhibitors                                       | 342/1739 (19.7)  | 917/1260 (72.8)  | 15/66 (22.7) | 33/143 (23.1)  | <0.001              |
| Angiotensin II receptor blockers                     | 265/1739 (15.2)  | 210/1260 (16.7)  | 7/66 (10.6)  | 11/143 (7.7)   | 0.026               |
| Mineralocorticoid receptor antagonists               | 233/1739 (13.4)  | 795/1260 (63.1)  | 30/66 (45.5) | 17/143 (11.9)  | <0.001              |
| Antiplatelets                                        | 420/1739 (24.2)  | 299/1260 (23.7)  | 15/66 (22.7) | 26/143 (18.2)  | 0.451               |
| Oral anticoagulants                                  | 424/1561 (27.2)  | 443/1246 (35.6)  | 36/62 (58.1) | 19/131 (14.5)  | <0.001              |
| Vitamin K antagonists                                | 296/1561 (19.0)  | 345/1246 (27.7)  | 24/62 (38.7) | 15/131 (11.5)  | <0.001              |
| All other (rivaroxaban, apixaban, dabigatran, other) | 128/1561 (8.2)   | 98/1246 (7.9)    | 12/62 (19.4) | 4/131 (3.1)    |                     |
| Antiarrhythmic drugs                                 | 264/1739 (15.2)  | 361/1260 (28.7)  | 12/66 (18.2) | 34/143 (23.8)  | <0.001              |

ACE, angiotensin-converting enzyme; ARVC, arrhythmogenic right ventricular cardiomyopathy; DCM, dilated cardiomyopathy; HCM, hypertrophic cardiomyopathy; RCM, restrictive cardiomyopathy.

<sup>a</sup>Whatever reason (atrial or ventricular arrhythmia).

<sup>b</sup>The Fisher's exact test.

Relatives when compared with probands were characterized by a lower median age at diagnosis (39.0 years, IQR 24–50, vs. 50.0 years, IQR 38–59,  $P < 0.001$ ), they underwent cardiac investigations [electrocardiogram (ECG), echocardiogram, Holter-ECG, and MRI] in a similar or greater proportion and a defibrillator was implanted as frequently (25.6% vs. 25.0%).

Incident patients when compared with prevalent patients were characterized by a greater median age at diagnosis (51.0 years, IQR 40–60, vs. 47.0 years, IQR 35–57,  $P < 0.001$ ), were more frequently probands (89.0% vs. 77.5%,  $P < 0.001$ ), had a familial disease less frequently (28.7% vs. 45.7%,  $P < 0.001$ ) and had a defibrillator implanted less frequently (16.7% vs. 33.6%,  $P < 0.001$ ).

Patients of the Pilot phase, when compared with the Long-Term phase, were more frequently relatives (52.9% vs. 9.7%,  $P < 0.001$ ), had a familial disease more frequently (46.4% vs. 34.4%,  $P < 0.001$ ), were more frequently diagnosed in the context of a family screening (16.1% vs. 9.1%,  $P < 0.001$ ), more frequently diagnosed with a rare underlying disease (6.2% vs. 3.1%,  $P < 0.001$ ) and were more frequently implanted with a defibrillator (28.3% vs. 24.7%,  $P = 0.023$ ).

Considering the four main regions, patients from South area were most frequently relatives (25.0%, global comparison,  $P < 0.001$ ), had a familial disease most frequently (49.4%,  $P < 0.001$ ), were most frequently diagnosed in the context of a family screening (17.1%,  $P < 0.001$ ) and more frequently diagnosed with a rare underlying disease (5.7%,  $P < 0.001$ ). Patients from East area were less likely to undergo MRI and genetic testing but more had Holter-ECG. Patients from West area were more frequently implanted with a defibrillator (32.7%,  $P < 0.001$ ).

## Discussion

This is the first multinational European registry on cardiomyopathies. The analysis shows that the mode of presentation varies substantially between cardiomyopathy subtypes, and that all patients, whether probands or relatives, undergo multiple cardiac investigations and require substantial medical and device therapy. By providing real-world contemporary data on clinical characteristics and management, the registry provides a platform for the evaluation of guideline implementation across a range of different health care providers and organizations in the Europe and elsewhere.

### Cardiomyopathy subtypes

As anticipated from previous studies,<sup>3–6,11</sup> HCM was the most frequent cardiomyopathy in the registry, followed by DCM, and then ARVC and RCM. The design of the registry did not allow us to estimate population prevalence of specific phenotypes, but it is notable that the ratio for DCM/HCM patients in this consecutive series was unexpectedly high, suggesting that the true prevalence of DCM could be higher than previously estimated and closer to the estimated prevalence of HCM. The study also shows the diversity and frequency of diagnostic tests that were performed, either for assessment of the cardiomyopathy, management of symptoms, or stratification of risk. This is illustrated by MRI, performed in nearly one-third of all patients, or by genetic testing, performed in more than one-third of patients. All these results emphasize the multidisciplinary approach and

**Table 3** Summary of basic features in adult patients with a cardiomyopathy according to predefined sub-groups

|                                                         | Probands<br>(n = 1929) | Relatives<br>(n = 395) | P.<br>value | Incident<br>(n = 1335) | Prevalent<br>(n = 1774) | P.<br>value | Pilot patient<br>(n = 1115) | Long-Term<br>patient<br>(n = 2093) | P.<br>value | North<br>(n = 543) | East<br>(n = 713) | West<br>(n = 481) | South<br>(n = 1427) | P.<br>value |
|---------------------------------------------------------|------------------------|------------------------|-------------|------------------------|-------------------------|-------------|-----------------------------|------------------------------------|-------------|--------------------|-------------------|-------------------|---------------------|-------------|
| Age at diagnosis<br>(years), median<br>(Q1–Q3), n       | 50.0 (38.0–59.0)       | 39.0 (24.0–50.0)       | <0.001      | 51.0 (40.0–60.0)       | 47.0 (35.0–57.0)        | <0.001      | 46.0 (32.0–58.0)            | 49.0 (38.0–59.0)                   | <0.001      | 49.0 (38.0–60.0)   | 48.0 (37.0–58.0)  | 50.0 (40.0–57.0)  | 49.5 (37.0–60.0)    | 0.384       |
| Males, n (%)                                            | 1728                   | 180                    |             | 1004                   | 969                     |             | 1092                        | 2065                               |             | 272                | 620               | 201               | 928                 |             |
| Proband (vs.<br>relative), n (%)                        | 1282/1929 (66.5)       | 216/395 (54.7)         | <0.001      | 915/1335 (68.5)        | 1117/1774 (63.0)        | 0.001       | 696/1115 (62.4)             | 1393/2093 (66.6)                   | 0.019       | 349/543 (64.3)     | 472/713 (66.2)    | 333/481 (69.2)    | 908/1427 (63.6)     | 0.138       |
| Familial disease,<br>n (%)                              | 524/1510 (34.7)        | 389/389 (100.0)        | <0.001      | 285/993 (28.7)         | 655/1434 (45.7)         | <0.001      | 423/912 (46.4)              | 534/1551 (34.4)                    | <0.001      | 141/358 (39.4)     | 132/500 (26.4)    | 108/396 (27.3)    | 576/1165 (49.4)     | <0.001      |
| Incident patient<br>(vs. prevalent),<br>n (%)           | 883/1846 (47.8)        | 109/388 (28.1)         | <0.001      | 109/388 (28.1)         | 326/1111 (29.3)         | <0.001      | 326/1111 (29.3)             | 1009/1998 (50.5)                   | <0.001      | 143/534 (26.8)     | 499/641 (77.8)    | 184/476 (38.7)    | 465/1414 (32.9)     | <0.001      |
| Family screening<br>as a reason for<br>diagnosis, n (%) | 68/1808 (3.8)          | 264/387 (68.2)         | <0.001      | 95/1269 (7.5)          | 246/1676 (14.7)         | 0.001       | 168/1042 (16.1)             | 180/1978 (9.1)                     | <0.001      | 46/520 (8.8)       | 36/669 (5.4)      | 31/416 (7.5)      | 235/1371 (17.1)     | <0.001      |
| Rare disease,<br>n (%) <sup>a</sup>                     | 62/1929 (3.2)          | 16/395 (4.1)           | 0.400       | 54/1335 (4.0)          | 75/1774 (4.2)           | 0.800       | 69/1115 (6.2)               | 65/2093 (3.1)                      | <0.001      | 12/543 (2.2)       | 21/713 (2.9)      | 19/481 (4.0)      | 82/1427 (5.7)       | <0.001      |
| Presence of<br>symptoms,<br>n (%)                       | 1613/1928 (83.7)       | 313/395 (79.2)         | 0.033       | 1165/1332 (87.5)       | 1538/1769 (86.9)        | 0.668       | 1107/1107 (100.0)           | 1675/2093 (80.0)                   | <0.001      | 512/543 (94.3)     | 627/712 (88.1)    | 456/475 (96.0)    | 1143/1426 (80.2)    | <0.001      |
| MRI, n (%)                                              | 468/1929 (24.3)        | 140/395 (35.4)         | <0.001      | 427/1335 (32.0)        | 506/1774 (28.5)         | 0.037       | 507/1115 (45.5)             | 437/2093 (20.9)                    | <0.001      | 176/543 (32.4)     | 139/713 (19.5)    | 153/481 (31.8)    | 474/1427 (33.2)     | <0.001      |
| Holter ECG,<br>n (%)                                    | 1005/1929 (52.1)       | 254/395 (64.3)         | <0.001      | 716/1335 (53.6)        | 976/1774 (55.0)         | 0.443       | 753/1115 (67.5)             | 999/2093 (47.7)                    | <0.001      | 246/543 (45.3)     | 464/713 (65.1)    | 176/481 (36.6)    | 857/1427 (60.1)     | <0.001      |
| Exercise test,<br>n (%)                                 | 582/1929 (30.2)        | 169/395 (42.8)         | <0.001      | 377/1335 (28.2)        | 722/1774 (40.7)         | <0.001      | 564/1115 (50.6)             | 546/2093 (26.1)                    | <0.001      | 206/543 (37.9)     | 146/713 (20.5)    | 254/481 (52.8)    | 492/1427 (34.5)     | <0.001      |
| Genetic testing<br>performed,<br>n (%)                  | 596/1763 (33.8)        | 227/373 (60.9)         | <0.001      | 228/1222 (18.7)        | 782/1644 (47.6)         | <0.001      | 462/1044 (44.3)             | 594/1913 (31.1)                    | <0.001      | 175/524 (33.4)     | 70/672 (10.4)     | 169/408 (41.4)    | 642/1315 (48.8)     | <0.001      |
| Cardioverter<br>defibrillator<br>implanted,<br>n (%)    | 482/1929 (25.0)        | 101/395 (25.6)         | 0.808       | 223/1335 (16.7)        | 596/1774 (33.6)         | <0.001      | 316/1115 (28.3)             | 516/2093 (24.7)                    | 0.023       | 148/543 (27.3)     | 122/713 (17.1)    | 179/481 (37.2)    | 381/1427 (26.7)     | <0.001      |
| Pacemaker<br>implanted,<br>n (%)                        | 213/1919 (11.1)        | 27/387 (7.0)           | 0.015       | 104/1327 (7.8)         | 208/1743 (11.9)         | <0.001      | 86/1077 (8.0)               | 238/2092 (11.4)                    | 0.003       | 61/536 (11.4)      | 56/704 (8.0)      | 65/477 (13.6)     | 136/1408 (9.7)      | 0.010       |

ECG, electrocardiogram; MRI, magnetic resonance imaging; Q, quartile.

<sup>a</sup>Rare disease: figures on pooled Pilot + LT phase populations.

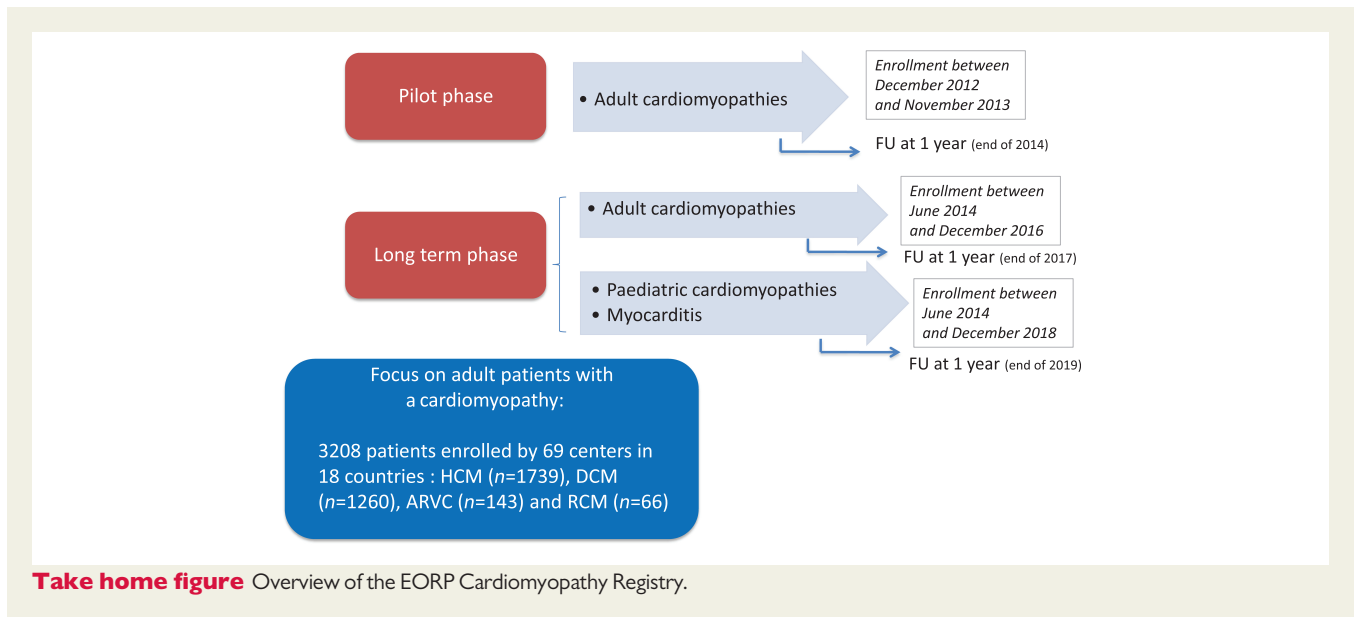

expertise that is required for the management of patients with a cardiomyopathy.<sup>6,12–17</sup>

## Arrhythmia burden

All cardiomyopathies increase the odds for life-threatening arrhythmias, but the degree to which they do so continues to raise controversy.<sup>3–9</sup> While recognizing that the patients enrolled in this series are necessarily selected, the frequency of malignant ventricular arrhythmia and atrial fibrillation was impressively high. This was paralleled by a high prevalence of prophylactic ICD implantation,<sup>3–8,18,19</sup> ablation procedures, and pacemaker implantation. Importantly, the arrhythmic risk varied substantially between cardiomyopathy subtypes with ventricular arrhythmia or ICD implantation most frequently reported in ARVC and atrial fibrillation being the dominant rhythm issue in RCM. The fact that Holter-ECG and exercise test were performed in two-third or less of patients, even in incident patients where investigations are expected to be optimal, suggest a gap in cardiac investigations.

## Familial forms and age at diagnosis

The registry emphasizes the high prevalence of inherited disease, with nearly 40% of the entire cohort reporting a familial disease, and the importance of referring relatives for evaluation since two-thirds of relatives were diagnosed through family screening. In addition, the burden of the disease in relatives was important since prevalence of symptoms and ICD implantation were as frequent as in probands. The fact that the number of relatives in the registry was relatively low (less than one-fifth) suggests there is still a gap in family screening.<sup>7,8,15,16</sup> In the total cohort of probands and relatives, the median age at diagnosis was relatively low, below, or equal to 50 years of age for all cardiomyopathies except RCM.<sup>3–6</sup> Age at diagnosis was variable, in agreement with the known age-related penetrance of these diseases. Distribution of age at diagnosis was, however, unexpectedly wide with the ‘extreme upper limit’ beyond 70 years of age for all cardiomyopathy subtypes and the ‘extreme lower limit’ well below

10 years of age for HCM and ARVC. These results may suggest a modification of the recommendations about family screening in relatives,<sup>7,8,15,16</sup> starting family screening earlier than the current threshold of ~10 years of age and extending family screening or follow-up beyond the currently recommended age of 50–60 years.

## From gaps to improvement of health care

The identification of potential gaps with existing recommendations is also supported by the heterogeneous management we observed between centres and between geographical areas. Important differences were especially observed between the Pilot phase, where centres were preselected because of a high level of expertise, and the Long-Term phase, where centres had a more variable level of expertise. This is illustrated by the high percentage of relatives in the Pilot phase, which probably reflects more developed family screening programs. The careful analysis of the Registry findings therefore suggests that some characteristics may be considered as potential markers of excellence in the context of quality evaluation of health services, particularly in the perspective of dedicated multidisciplinary heart teams that might be useful as shown in other areas.<sup>20,21</sup> These indicators of expertise for a given centre may include the percentage of cardiac and extracardiac investigations performed in patients, the ratio of relatives vs. probands, the rate of patients with a rare cause, the median age at diagnosis of patients.

Finally, differences we observed among the various geographic areas suggest that comparing the organization of health care systems for cardiomyopathies in the various countries may provide valuable insights that can be used for improvement of health care services in the Europe. Since recommendations or expert consensus for the management of the patients and families are available,<sup>7,8,14–16</sup> including about global management of arrhythmia and prevention of sudden cardiac death<sup>22</sup>, it can be hypothesized that variations in service provision are mostly related to economical or structural reasons.



## Limitations

Similar to registries in other fields, the voluntary nature of the enrolling centres, associated with their predefined characteristics, inevitably implies an uncertain representativeness of the enrolling network with respect to the Europe as a whole.

## Conclusions

This is the first European registry focused on adult patients with the various cardiomyopathy subtypes (see *Take home figure*). It provides a unique picture of contemporary features and management of these patients. The results emphasize the complexity of services and multi-disciplinary expertise required for the management of patients with a cardiomyopathy. The analysis of the results also identified potential gaps with existing recommendations. Work is warranted to understand the large variation in services provision as well as renewed efforts to provide evidence-based diagnostic processes and therapies.

## Supplementary material

Supplementary material is available at *European Heart Journal* online.

## Acknowledgements

Data collection was conducted by the EORP department from the ESC by Rachid Mir Hassaine as Clinical Project Manager, Emanuela Fiorucci, Myriam Glemot, Elin Folkesson Lefrancq and Patti-Ann McNeill as Project Officers, Marème Konté and Sebastien Authier as Data Managers. Statistical analyses were performed by Cécile Laroche. Overall activities were co-ordinated and supervised by Dr Aldo P. Maggioni (EORP Scientific Co-ordinator). All investigators are listed in the [Supplementary material online, Appendix 1](#).

## Funding

Since the start of EORP, the following companies have supported the programme: Abbott Vascular Int. (2011–2014), Amgen Cardiovascular (2009–2018), AstraZeneca (2014–2017), Bayer AG (2009–2018), Boehringer Ingelheim (2009–2019), Boston Scientific (2009–2012), The Bristol Myers Squibb and Pfizer Alliance (2011–2019), Daiichi Sankyo Europe GmbH (2011–2020), The Alliance Daiichi Sankyo Europe GmbH and Eli Lilly and Company (2014–2017), Edwards (2016–2019), Gedeon Richter Plc. (2014–2016), Menarini Int. Op. (2009–2012), MSD-Merck & Co. (2011–2014), Novartis Pharma AG (2014–2017), ResMed (2014–2016), Sanofi (2009–2011), SERVIER (2009–2018).

**Conflict of interest:** P.C. reports personal fees from Boehringer, Novartis, Amicus, and MyoKardia, non-financial support from Genzyme, grants and personal fees from Sanofi and Shire, personal fees and non-financial support from Servier, outside the submitted work. P.E. reports grants and personal fees from Sanofi Genzyme, personal fees from Pfizer, MyoKardia, and Shire, outside the submitted work. L.T. reports personal fees from Servier, CVIE Therapeutics, and Cardiorentis, outside the submitted work. M.T. reports personal fees from Bayer, Kowa, Janssen-Cilag, Perfuse Group, Servier, Celyad, grants from EU Framework Program VII and Polish National Center for Research and Development, outside the submitted work. A.P.M. reports personal fees from Novartis, Cardiorentis, Bayer and Fresenius, outside the submitted work. T.M.H. reports having worked as clinical consultant at Blueprint Genetics and being Member of Sanofi Genzyme Fabry advisory board in Finland,

outside the submitted work. J.P.K. reports personal fees from MyoKardia and BioMarin, outside the submitted work. J.S.M. reports personal fees from Shire and Genzyme, outside the submitted work. All other authors declared no conflict of interest.

## References

- Elliott P, Andersson B, Arbustini E, Bilinska Z, Cecchi F, Charron P, Dubourg O, Kühl U, Maisch B, McKenna WJ, Monserrat L, Pankuweit S, Rapezzi C, Seferovic P, Tavazzi L, Keren A. Classification of the cardiomyopathies: a position statement from the European Society Of Cardiology Working Group on Myocardial and Pericardial Diseases. *Eur Heart J* 2007;**29**:270–276.
- Maron BJ, Towbin JA, Thiene G, Antzelevitch C, Corrado D, Arnett D, Moss AJ, Seidman CE, Young JB; American Heart Association; Council on Clinical Cardiology, Heart Failure and Transplantation Committee; Quality of Care and Outcomes Research and Functional Genomics and Translational Biology Interdisciplinary Working Groups; Council on Epidemiology and Prevention. Contemporary definitions and classification of the cardiomyopathies: an American Heart Association Scientific Statement from the Council on Clinical Cardiology, Heart Failure and Transplantation Committee; Quality of Care and Outcomes Research and Functional Genomics and Translational Biology Interdisciplinary Working Groups; and Council on Epidemiology and Prevention. *Circulation* 2006;**113**:1807–1816.
- Weintraub RG, Semsarian C, Macdonald P. Dilated cardiomyopathy. *Lancet* 2017;**390**:400–414.
- Veselka J, Anavekar NS, Charron P. Hypertrophic obstructive cardiomyopathy. *Lancet* 2017;**389**:1253–1267.
- Mogensen J, Arbustini E. Restrictive cardiomyopathy. *Curr Opin Cardiol* 2009;**24**:214–220.
- Corrado D, Link MS, Calkins H. Arrhythmogenic right ventricular cardiomyopathy. *N Engl J Med* 2017;**376**:61–72.
- Elliott PM, Anastasakis A, Borgers MA, Borggreve M, Cecchi F, Charron P, Hagege AA, Lafont A, Limongelli G, Mahrholdt H, McKenna WJ, Mogensen J, Nihoyannopoulos P, Nistri S, Pieper PG, Pieske B, Rapezzi C, Rutten FH, Tillmanns C, Watkins H. 2014 ESC Guidelines on diagnosis and management of hypertrophic cardiomyopathy: the Task Force for the Diagnosis and Management of Hypertrophic Cardiomyopathy of the European Society of Cardiology (ESC). *Eur Heart J* 2014;**35**:2733–2779.
- Pinto YM, Elliott PM, Arbustini E, Adler Y, Anastasakis A, Böhm M, Duboc D, Gimeno J, de Groote P, Imazio M, Heymans S, Klingel K, Komajda M, Limongelli G, Linhart A, Mogensen J, Moon J, Pieper PG, Seferovic PM, Schueler S, Zamorano JL, Caforio AL, Charron P. Proposal for a revised definition of dilated cardiomyopathy, hypokinetic non-dilated cardiomyopathy, and its implications for clinical practice: a position statement of the ESC working group on myocardial and pericardial diseases. *Eur Heart J* 2016;**37**:1850–1858.
- Bagnall RD, Weintraub RG, Ingles J, Dufloy J, Yeates L, Lam L, Davis AM, Thompson T, Connell V, Wallace J, Naylor C, Crawford J, Love DR, Hallam L, White J, Lawrence C, Lynch M, Morgan N, James P, Du Sart D, Puranik R, Langlois N, Vohra J, Winship I, Atherton J, McGaughan J, Skinner JR, Semsarian C. A prospective study of sudden cardiac death among children and young adults. *N Engl J Med* 2016;**374**:2441–2452.
- Elliott P, Charron P, Blanes JR, Tavazzi L, Tendra M, Konté M, Laroche C, Maggioni AP; EORP Cardiomyopathy Registry Pilot Investigators. European Cardiomyopathy Pilot Registry: EURObservational Research Programme of the European Society of Cardiology. *Eur Heart J* 2016;**37**:164–173.
- Codd MB, Sugrue DD, Gersh BJ, Melton LJ 3rd. Epidemiology of idiopathic dilated and hypertrophic cardiomyopathy. A population-based study in Olmsted County, Minnesota, 1975–1984. *Circulation* 1989;**80**:564–572.
- Aquaro GD, Barison A, Todiere G, Grigoratos C, Ait Ali L, Di Bella G, Emdin M, Festa P. Usefulness of combined functional assessment by cardiac magnetic resonance and tissue characterization versus task force criteria for diagnosis of arrhythmogenic right ventricular cardiomyopathy. *Am J Cardiol* 2016;**118**:1730–1736.
- Saeed M, Liu H, Liang CH, Wilson MW. Magnetic resonance imaging for characterizing myocardial diseases. *Int J Cardiovasc Imaging* 2017;**33**:1395–414.
- Rapezzi C, Arbustini E, Caforio AL, Charron P, Gimeno-Blanes J, Heliö T, Linhart A, Mogensen J, Pinto Y, Ristic A, Seggewiss H, Sinagra G, Tavazzi L, Elliott PM. Diagnostic work-up in cardiomyopathies: bridging the gap between clinical phenotypes and final diagnosis. A position statement from the ESC Working Group on Myocardial and Pericardial Diseases. *Eur Heart J* 2013;**34**:1448–1458.
- Charron P, Arad M, Arbustini E, Basso C, Bilinska Z, Elliott P, Helio T, Keren A, McKenna WJ, Monserrat L, Pankuweit S, Perrot A, Rapezzi C, Ristic A, Seggewiss H, van Langen I, Tavazzi L; European Society of Cardiology Working Group on Myocardial and Pericardial Diseases. Genetic counselling and testing in cardiomyopathies: a position statement of the European Society of Cardiology Working Group on Myocardial and Pericardial Diseases. *Eur Heart J* 2010;**31**:2715–2726.

16. Ackerman MJ, Priori SG, Willems S, Berul C, Brugada R, Calkins H, Camm AJ, Ellinor PT, Gollob M, Hamilton R, Hershberger RE, Judge DP, Le Marec H, McKenna WJ, Schulze-Bahr E, Semsarian C, Towbin JA, Watkins H, Wilde A, Wolpert C, Zipes DP. HRS/EHRA expert consensus statement on the state of genetic testing for the channelopathies and cardiomyopathies this document was developed as a partnership between the Heart Rhythm Society (HRS) and the European Heart Rhythm Association (EHRA). *Heart Rhythm* 2011;**13**: 1308–1339.

17. Walsh R, Thomson KL, Ware JS, Funke BH, Woodley J, McGuire KJ, Mazzarotto F, Blair E, Seller A, Taylor JC, Minikel EV, Exome Aggregation Consortium, MacArthur DG, Farrall M, Cook SA, Watkins H. Reassessment of Mendelian gene pathogenicity using 7,855 cardiomyopathy cases and 60,706 reference samples. *Genet Med* 2017;**19**:192–203.

18. Orgeron GM, James CA, Te Riele A, Tichnell C, Murray B, Bhonsale A, Kamel IR, Zimmerman SL, Judge DP, Crosson J, Tandri H, Calkins H. Implantable cardioverter-defibrillator therapy in arrhythmogenic right ventricular dysplasia/cardiomyopathy: predictors of appropriate therapy, outcomes, and complications. *J Am Heart Assoc* 2017;**6**:pii: e006242. doi:10.1161/JAHA.117.006242.

19. Wolff G, Lin Y, Karathanos A, Brockmeyer M, Wolters S, Nowak B, Fümkrantz A, Makimoto H, Kelm M, Schulze V. Implantable cardioverter/defibrillators for primary prevention in dilated cardiomyopathy post-DANISH: an updated meta-analysis and systematic review of randomized controlled trials. *Clin Res Cardiol* 2017;**106**:501–513.

20. Masters J, Morton G, Anton I, Szymanski J, Greenwood E, Grogono J, Flett AS, Cleland JG, Cowburn PJ. Specialist intervention is associated with improved patient outcomes in patients with decompensated heart failure: evaluation of the impact of a multidisciplinary inpatient heart failure team. *Open Heart* 2017; **4**: e000547.

21. Fumagalli S, Chen J, Dobreanu D, Madrid AH, Tilz R, Dagnes N. The role of the Arrhythmia Team, an integrated, multidisciplinary approach to treatment of patients with cardiac arrhythmias: results of the European Heart Rhythm Association survey. *Europace* 2016;**18**:623–627.

22. Priori SG, Blomström-Lundqvist C, Mazzanti A, Blom N, Borggrefe M, Camm J, Elliott PM, Fitzsimons D, Hatala R, Hindricks G, Kirchhof P, Kjeldsen K, Kuck KH, Hernandez-Madrid A, Nikolaou N, Norekvål TM, Spaulding C, Van Veldhuisen DJ. 2015 ESC Guidelines for the management of patients with ventricular arrhythmias and the prevention of sudden cardiac death: The Task Force for the Management of Patients with Ventricular Arrhythmias and the Prevention of Sudden Cardiac Death of the European Society of Cardiology (ESC). *Eur Heart J* 2015;**36**:2793–2867.

Corrigendum

doi:10.1093/eurheartj/ehx635  
 Online publish-ahead-of-print 30 October 2017

**Corrigendum to:** Clinical implication of an impaired fasting glucose and prehypertension related to new onset atrial fibrillation in a healthy Asian population without underlying disease: a nationwide cohort study in Korea [*Eur Heart J* (2017); 38 (34): 2599–2607].

The authors of the above article wish to inform readers that the following correction has been made post-publication: *Figure 2* was corrected to replace  $20 < \text{BMI} \geq 25$  with  $20 \leq \text{BMI} < 25$ .

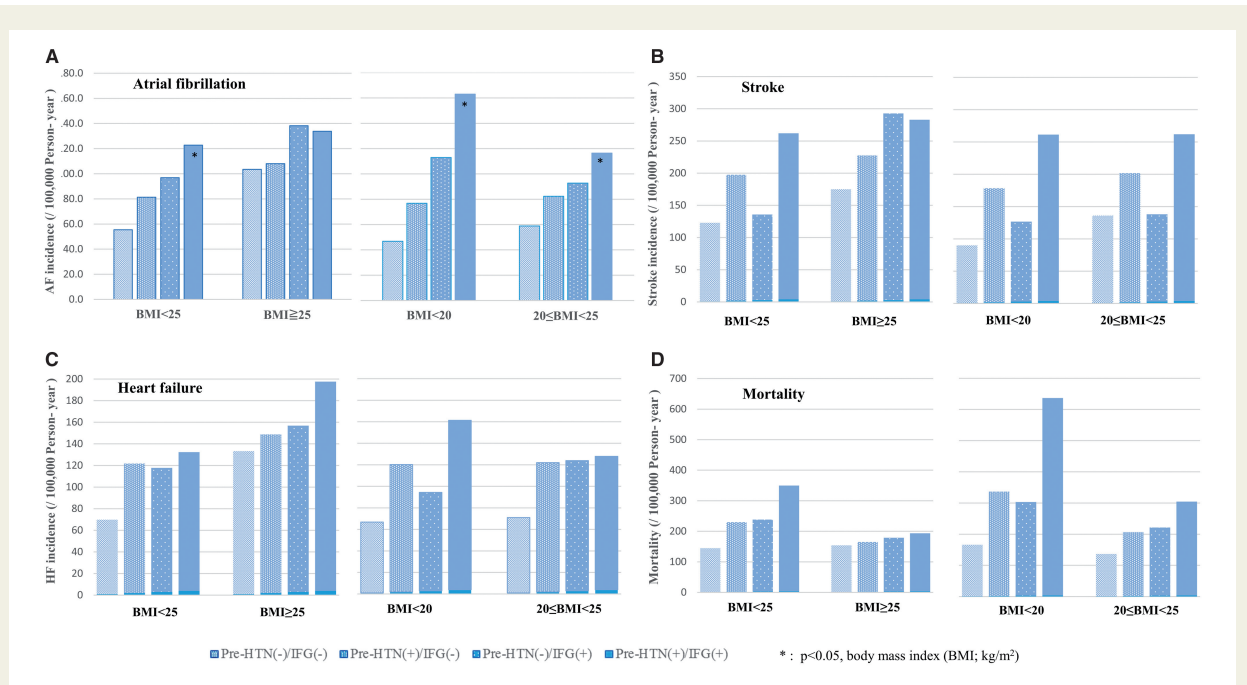

**Figure 2** The incidence of new onset AF, strokes, heart failure, and mortality according to the BMI (/100 000 person-years). (Left: BMI < 25 kg/m<sup>2</sup> vs. BMI ≥ 25 kg/m<sup>2</sup>, right: BMI < 20 kg/m<sup>2</sup> vs. 20 ≤ BMI < 25 kg/m<sup>2</sup>). (A) The incidence of AF according to the BMI (left, right), (B) The incidence of stroke according to the BMI (left, right), (C) The incidence of HF according to the BMI (left, right), (D) Mortality according to the BMI (left, right). AF, atrial fibrillation; HF, heart failure; HTN, hypertension; IFG, impaired fasting glucose; BMI, bodymass index.
